# Supplementary material
Source: Research Square preprint supplement (doi:10.21203/rs.3.rs-9976981/v1)
Supplement: Supplementary file 1 [file 05103ff8a1ad255d339fb29d.docx]

**Supporting information for**

**Uncovering Planar Central Chirality: Planar Tetracoordinate Chiral Carbon Systems**

Devipriya Sivadasan1, Krishnan Thirumoorthy1,2*

1Department of Chemistry, School of Advanced Sciences, Vellore Institute of Technology, Vellore 632014, Tamil Nadu, India.

2School of Computer Sciences and Engineering, Vellore Institute of Technology, Vellore 632014, Tamil Nadu, India.

E-mail: [kthirumoorthy@gmail.com](mailto:kthirumoorthy@gmail.com) & thirumoorthy.krishnan@vit.ac.in

**Contents**

List of Figures ……………………………………………………………………… S2

List of Tables ……………………………………………………………………… S2

**List of Figures**

**S1** Optimized geometries of ptCC systems with their bond lengths in Å and their chemical formula, dipole moments (in Debye), and the number of imaginary frequencies (NImag) calculated at ωB97XD/aug-cc-pVTZ level of theory……………………………… S3

**List of Tables**

**S1** Absolute configuration, total energies (E), zero-point vibrational energies (ZPVE), ZPVE-corrected total energies (E+ZPVE), dipole moments (μ), and the number of imaginary frequencies (NImag) of ptCC systems calculated at MP2/aug-cc-pVTZ level of theory……………………………………………………………………………….. S4

**S2** Absolute configuration, total energies (E), zero-point vibrational energies (ZPVE), ZPVE-corrected total energies (E+ZPVE), dipole moments (μ), and the number of imaginary frequencies (NImag) of ptCC systems calculated at ωB97XD/aug-cc-pVTZ level of theory………………. ……………………………………………………………… S5

**S3** The natural atomic charges of atoms in the ptCC systems calculated at the MP2/aug-cc-pVTZ level of theory.………………………………………………………………. S6

**S4** Wiberg bond indices of ptCC systems calculated at MP2/aug-cc-pVTZ level of theory……………..………………………………….... S7

**S5** Cartesian coordinates (in Å units) of the optimized geometries of the ptCC systems calculated at the MP2/aug-cc-pVTZ level of theory……………………………… S8

**S6** Cartesian coordinates (in Å units) of the optimized geometries of the ptCC systems calculated at ωB97XD/aug-cc-pVTZ level of theory………………………………. S9


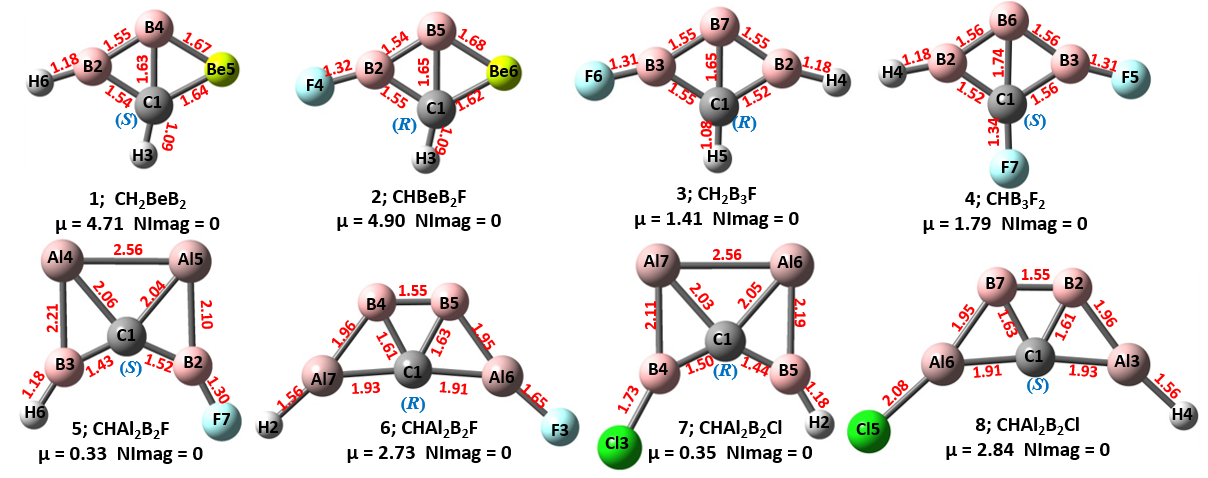


**Figure S1**. Optimized geometries of ptCC systems with their bond lengths in Å and their chemical formula, dipole moments (in Debye), and the number of imaginary frequencies (NImag) calculated at ωB97XD/aug-cc-pVTZ level of theory.

**Table S1**. Absolute configuration, total energies (E), zero-point vibrational energies (ZPVE), ZPVE-corrected total energies (E+ZPVE), dipole moments (Debye), and the number of imaginary frequencies (NImag) of ptCC systems calculated at the MP2/aug-cc-pVTZ level of theory.

| **Chemical Formula** | **ptCC**  **Systems** | **Absolute Configuration** | **Energy**  **(a.u)** | **ZPVE (a.u)** | **E+ZPVE (a.u)** | **μ**  **Debye** | **NImag** |
| --- | --- | --- | --- | --- | --- | --- | --- |
| CH2BeB2 | 1 | S | -103.3029662 | 0.030847 | -103.272119 | 4.55 | 0 |
| CHBeB2F | 2 | R | -202.5091583 | 0.025285 | -202.483874 | 4.78 | 0 |
| CH2B3F | 3 | R | -213.2567018 | 0.0369 | -213.219802 | 1.23 | 0 |
| CHB3F2 | 4 | S | -312.3690588 | 0.029898 | -312.339161 | 1.79 | 0 |
| CHAl2B2F | 5 | S | -671.8804443 | 0.024156 | -671.856288 | 0.33 | 0 |
| CHAl2B2F | 6 | R | -671.8487478 | 0.021756 | -671.826992 | 2.65 | 0 |
| CHAl2B2Cl | 7 | R | -1031.844775 | 0.022873 | -1031.821902 | 0.62 | 0 |
| CHAl2B2Cl | 8 | S | -1031.819752 | 0.020921 | -1031.798831 | 2.72 | 0 |

**Table S2**. Absolute configuration, total energies (E), zero-point vibrational energies (ZPVE), ZPVE-corrected total energies (E+ZPVE), dipole moments (Debye), and the number of imaginary frequencies (NImag) of ptCC systems calculated at ωB97XD/aug-cc-pVTZ level of theory.

| **Chemical Formula** | **ptCC**  **Systems** | **Absolute Configuration** | **Energy**  **(a.u)** | **ZPVE (a.u)** | **E+ZPVE**  **(a.u)** | **μ**  **Debye** | **NImag** |
| --- | --- | --- | --- | --- | --- | --- | --- |
| CH2BeB2 | 1 | S | -103.6022146 | 0.031253 | -103.570961 | 4.71 | 0 |
| CHBeB2F | 2 | R | -202.9171807 | 0.025526 | -202.891655 | 4.90 | 0 |
| CH2B3F | 3 | R | -213.6765606 | 0.037104 | -213.639457 | 1.41 | 0 |
| CHB3F2 | 4 | S | -312.9042604 | 0.030114 | -312.874146 | 1.06 | 0 |
| CHAl2B2F | 5 | S | -673.0861943 | 0.024064 | -673.062131 | 0.28 | 0 |
| CHAl2B2F | 6 | R | -673.0563765 | 0.022464 | -673.033912 | 2.73 | 0 |
| CHAl2B2Cl | 7 | R | -1033.434398 | 0.022711 | -1033.411687 | 0.35 | 0 |
| CHAl2B2Cl | 8 | S | -1033.417645 | 0.021552 | -1033.396093 | 2.84 | 0 |

**Table S3**: The natural atomic charges of atoms in the ptCC systems calculated at the MP2/aug-cc-pVTZ level of theory.

| **ptCC Systems** | **Atom** | **Natural Atomic Charge** | **ptCC Systems** | **Atom** | **Natural Atomic Charge** |
| --- | --- | --- | --- | --- | --- |
| 1 | C1 | -1.44245 | 2 | C1 | -1.49138 |
| B2 | 0.20571 | B2 | 0.79073 |
| H3 | 0.25753 | H3 | 0.26277 |
| B4 | -0.56149 | F4 | -0.50557 |
| Be5 | 1.59745 | B5 | -0.66671 |
| H6 | -0.05674 | Be6 | 1.61015 |
| 3 | C1 | -0.86734 | 4 | C1 | -0.09405 |
| B2 | 0.23954 | B2 | 0.1008 |
| B3 | 0.82086 | B3 | 0.71769 |
| H4 | -0.04414 | H4 | -0.02832 |
| H5 | 0.26825 | F5 | -0.48966 |
| F6 | -0.49578 | B6 | 0.16023 |
| B7 | 0.07861 | F7 | -0.36668 |
| 5 | C1 | -1.96252 | 6 | C1 | -1.65695 |
| B2 | 0.9401 | H2 | -0.38474 |
| B3 | 0.46857 | F3 | -0.77175 |
| Al4 | 0.59674 | B4 | -0.30135 |
| Al5 | 0.57399 | B5 | -0.34273 |
| H6 | -0.08858 | Al6 | 1.96025 |
| F7 | -0.52829 | Al7 | 1.49727 |
| 7 | C1 | -1.94874 | 8 | C1 | -1.63621 |
| H2 | -0.09356 | B2 | -0.29492 |
| Cl3 | -0.15886 | Al3 | 1.49697 |
| B4 | 0.45258 | H4 | -0.38536 |
| B5 | 0.48492 | Cl5 | -0.52506 |
| Al6 | 0.60733 | Al6 | 1.64845 |
| Al7 | 0.65633 | B7 | -0.30387 |

**Table S4**: Wiberg bond indices of ptCC systems calculated at the MP2/aug-cc-pVTZ level of theory. The atom numbering follows that in the manuscript **Figure 2**.

| **1** | | **2** | |
| --- | --- | --- | --- |
| C1 - B2 | 1.0844 | C1 - B2 | 0.9995 |
| C1 - B4 | 1.1734 | C1 - H3 | 0.8559 |
| C1 - Be5 | 0.1732 | C1 – B5 | 1.2052 |
| C1 - H3 | 0.8570 | C1 - Be6 | 0.1737 |
| B4 - B2 | 1.2209 | B2 - B5 | 1.1806 |
| B4 - Be5 | 0.5026 | B5 - Be6 | 0.4862 |
| B2 - H6 | 0.9784 | B2 - F4 | 0.7965 |
| **3** | | **4** | |
| C1 - B2 | 1.0707 | C1 - B2 | 1.1317 |
| C1 - B3 | 0.966 | C1 - B3 | 0.9861 |
| C1 - H5 | 0.8587 | C1 - B6 | 0.7299 |
| C1 - B7 | 0.8366 | C1 - F7 | 0.8609 |
| B2 - H4 | 0.9818 | B2 - H4 | 0.9826 |
| B2 - B7 | 1.1553 | B2 - B6 | 1.1772 |
| B3 - B7 | 1.1191 | B3 - B6 | 1.1439 |
| B3 – F6 | 0.8130 | B3 - F5 | 0.8176 |
| **5** | | **6** | |
| C1 - B2 | 1.0406 | C1 - B4 | 1.1117 |
| C1 - B3 | 1.2942 | C1 - B5 | 1.0978 |
| C1 - Al4 | 0.3379 | C1 - Al6 | 0.4120 |
| C1 - Al5 | 0.3423 | C1 - Al7 | 0.4554 |
| B3 - Al4 | 0.5298 | B4 - B5 | 1.2097 |
| B2 - Al5 | 0.6437 | B4 - Al7 | 0.8240 |
| B2 - F7 | 0.7871 | B5 - Al6 | 0.7788 |
| B3 - H6 | 0.9669 | Al6 - F3 | 0.4121 |
| Al4 - Al5 | 0.5624 | Al7 - H2 | 0.8367 |
| **7** | | **8** | |
| C1 - B5 | 1.22 | C1 - B2 | 1.1044 |
| C1 - B4 | 1.1403 | C1 - B7 | 1.0964 |
| C1 - Al6 | 0.3231 | C1 - Al3 | 0.4526 |
| C1 - Al7 | 0.3216 | C1 - Al6 | 0.4458 |
| B4 - Al7 | 0.5829 | B2 - B7 | 1.2068 |
| B5 - Al6 | 0.5497 | B2 - Al3 | 0.8244 |
| B4 - Cl3 | 1.1839 | B7 - Al6 | 0.8115 |
| B5 - H2 | 0.9653 | Al3 - H4 | 0.836 |
| Al6 - Al7 | 0.5221 | Al6 - Cl5 | 0.7818 |

**Table S5**. Cartesian coordinates (in Å units) of the optimized geometries of the ptCC systems calculated at the MP2/aug-cc-pVTZ level of theory

| 1 | 2 |
| --- | --- |
| C 0.639948 -0.647059 -0.000069  B -0.657855 0.213393 0.000092  H 0.400779 -1.708027 -0.000149  B 0.676766 1.004709 0.000002  Be 2.109692 0.100166 -0.000064  H -1.789464 -0.113192 -0.000072 | C 0.647242 -0.647637 -0.000058  B -0.643771 0.207656 0.000137  H 0.403376 -1.707024 -0.000475  F -1.919046 -0.129164 0.000241  B 0.677985 1.003562 -0.000552  Be 2.088105 0.097717 0.000463 |
| 3 | 4 |
| C -0.175687 1.073162 0.002168  B -1.669408 0.740333 0.002175  B 0.801018 -0.135347 -0.004010  H -2.653965 1.380179 0.004861  H 0.201134 2.091683 0.004665  F 2.108576 -0.264845 -0.006550  B -0.720039 -0.499870 -0.003103 | C 0.636544 -0.710988 0.000265  B 1.946070 0.070723 0.000141  B -0.635954 0.212588 0.000039  H 3.083929 -0.220830 0.000156  F -1.925514 -0.030408 -0.000019  B 0.704141 1.032043 -0.000239  F 0.511264 -2.057729 -0.000410 |
| 5 | 6 |
| C 0.008501 0.727451 0.000553  B 1.384701 1.349023 0.001701  B -1.301187 1.361723 0.000574  Al -1.330220 -0.859063 -0.001453  Al 1.341443 -0.831402 -0.000146  H -1.943183 2.353321 0.001298  F 1.987618 2.506871 0.003002 | C -0.130026 0.630350 -0.000298  H 1.419501 3.565042 -0.002083  F -3.334997 -0.507768 0.000776  B 1.402582 0.038673 -0.000406  B 0.232020 -1.000125 0.000455  Al -1.679649 -0.526996 0.000240  Al 1.248145 2.009915 -0.000935 |
| 7 | 8 |
| C -0.072890 0.487859 -0.000253  H -2.611295 0.541318 -0.000297  Cl 0.147727 3.537749 -0.001625  B 0.507285 1.858458 -0.000897  B -1.496590 0.148189 -0.000092  Al -0.092228 -1.573331 0.000870  Al 1.951664 0.194378 -0.000215 | C -0.264092 0.690212 -0.000303  B 0.140588 -0.902710 0.000367  Al -1.799047 -0.513291 0.000485  H -3.363231 -0.498093 0.000937  Cl 1.252772 4.175803 -0.002685  Al 1.061610 2.099094 -0.001172  B 1.305071 0.143606 -0.000136 |

**Table S6**. Cartesian coordinates (in Å units) of the optimized geometries of the ptCC systems calculated at ωB97XD/aug-cc-pVTZ level of theory

| 1 | 2 |
| --- | --- |
| C 0.620412 -0.639898 -0.000095  B -0.658986 0.210597 0.000044  H 0.447506 -1.711689 -0.000183  B 0.678172 0.989322 -0.000149  Be 2.093504 0.090959 0.000123  H -1.800742 -0.089302 -0.000001 | C 0.646318 -0.647776 -0.000088  B -0.645904 0.206924 0.000107  H 0.408671 -1.708450 -0.000384  F -1.922720 -0.125439 0.000184  B 0.678179 1.002319 -0.000405  Be 2.089347 0.097531 0.000343 |
| 3 | 4 |
| C -0.176175 1.063903 -0.000294  B -1.664637 0.737879 -0.000211  B 0.798021 -0.135271 0.000713  H -2.646309 1.386593 -0.000929  H 0.195430 2.082556 -0.000959  F 2.100823 -0.259996 0.001429  B -0.715525 -0.490370 0.000458 | C -0.556494 0.180852 -0.000026  B -1.700016 -0.878432 -0.000023  B 0.832279 -0.444897 -0.000101  B -0.280454 -1.536387 0.000349  F -0.811857 1.497394 -0.000031  F -3.006118 -0.804354 -0.000118  H 1.923572 -0.003607 -0.000218 |
| 5 | 6 |
| C -0.036666 0.497868 -0.000032  B -1.430260 -0.097576 0.000180  B 0.505206 1.817912 -0.000184  Al 2.004662 0.189191 0.000154  Al 0.106868 -1.533807 -0.000132  H 0.436779 2.995317 -0.000177  F -2.661285 0.328614 0.000024 | C -0.111303 0.603692 -0.000292  H 1.363257 3.547861 -0.002053  F -3.302358 -0.456933 0.000728  B 1.399314 0.036958 -0.000283  B 0.234073 -0.991646 0.000334  Al -1.656473 -0.519826 0.000301  Al 1.231064 1.988985 -0.000985 |
| 7 | 8 |
| C -0.375447 0.443077 -0.000047  H -0.552247 2.978075 -0.000154  Cl 2.630049 0.062597 -0.000001  B 0.936123 -0.274662 0.000001  B -0.787535 1.821515 -0.000117  Al -2.426291 0.366277 0.000016  Al -0.738749 -1.553043 0.000001 | C 0.978200 0.019967 0.000048  B 2.139569 1.138997 -0.000099  Al 2.759185 -0.720696 0.000041  H 3.500951 -2.097784 0.000230  Cl -2.756306 -0.484372 -0.000006  Al -0.890535 0.430267 0.000075  B 0.659861 1.614704 -0.000081 |
